# Supplementary material
Source: PubMed Central journal article supplement (PMC7185939)
Supplement: mmc1.pdf [file mmc1.pdf]

# THE LANCET

## **Supplementary appendix**

This appendix formed part of the original submission. We post it as supplied by the authors.

Supplement to: Panchaud A, Favre G, Pomar L, et al. An international registry for emergent pathogens and pregnancy. *Lancet* 2020; published online April 27. [https://doi.org/10.1016/S0140-6736\(20\)30979-X](https://doi.org/10.1016/S0140-6736(20)30979-X)

| Name                      | Surname         | Service                                                                                                            | Hospital                                                                                                  | City                       | Country        |
|---------------------------|-----------------|--------------------------------------------------------------------------------------------------------------------|-----------------------------------------------------------------------------------------------------------|----------------------------|----------------|
| Tallarek                  | Ann-Christin    | Klinik und Poliklinik für Geburtshilfe und Pränatalmedizin                                                         | Universitätsklinikum Hamburg-Eppendorf                                                                    | Hamburg                    | Germany        |
| Strizek                   | Brigitte        | Department of Obstetrics and Prenatal Medicine                                                                     | University Hospital Bonn                                                                                  | Bonn                       | Germany        |
| Hecher                    | Kurt            | Fetal Medicine                                                                                                     | Universiteres Perinatalzentrum                                                                           | Hamburg                    | Germany        |
| Bockenhoff               | Paul            | Department of Obstetrics and Prenatal Medicine                                                                     | University Hospital Bonn                                                                                  | Bonn                       | Germany        |
| Schrey-Petersen           | Susanne         | Department of Obstetrics                                                                                           | University Hospital Leipzig                                                                               | Leipzig                    | Germany        |
| Mullins                   | Edward          | Gyncologie-Obsttrique                                                                                            | Queen Charlotte's and Chelsea Hospital                                                                    | Londres                    | United Kingdom |
| Bromley                   | Rebecca         | Division of Evolution and Genomic Sciences, Faculty of Biology, Medicine and Health                                | Manchester University                                                                                     | Manchester                 | United Kingdom |
| Whitehead                 | Clare           | Department of Obstetrics and Gynaecology                                                                           | University of Melbourne<br>Royal Women's Hospital                                                         | Melbourne                  | Australia      |
| Roink                     | Daniel          | Department of Obstetrics and Gynaecology                                                                           | School of Clinical Sciences<br>Monash University                                                          | Melbourne                  | Australia      |
| Deprest                   | Jan             | Clinical Department of Obstetrics and Gynecology                                                                   | University Hospitals Leuven                                                                               | Leuven                     | Belgium        |
| Richter                   | Jute            | Clinical Department of Obstetrics and Gynecology                                                                   | University Hospitals Leuven                                                                               | Leuven                     | Belgium        |
| Gomes Luz                 | Adriana         | Department of Obstetrics na Gynecology                                                                             | University of Campinas                                                                                    | Campinas                   | Brazil         |
| Bohrer                    | Betania         | Neonatology<br>PI at Neonatology Service                                                                           | Hospital de Clinicas de Porto Alegre<br>Universidade Federal do Rio Grande do Sul                         | Rio Grande                 | Brazil         |
| Carvalho Ribeiro-de-Vale  | Carolina        | Department of Obstetrics na Gynecology                                                                             | Hospital Infection Control Center of CASM/UNICAMP<br>University of Campinas                               | Campinas                   | Brazil         |
| Garanhani Surita          | Fernanda        | Department of Obstetrics na Gynecology                                                                             | University of Campinas                                                                                    | Campinas                   | Brazil         |
| Schuler-Facini            | Lavinia         | Dysomphological and evolutive outcomes<br>PI at Medical Genetics Service, and Teratogen Information Service – SIAT | Hospital de Clinicas de Porto Alegre<br>Universidade Federal do Rio Grande do Sul                         | Rio Grande                 | Brazil         |
| Osorio Wender             | Maria Celeste   | pregnancy                                                                                                          | Hospital de Clinicas de Porto Alegre<br>Universidade Federal do Rio Grande do Sul                         | Rio Grande                 | Brazil         |
| Da Rocha Oppermann        | Maria Lucia     | delivery<br>PI at maternity Ward                                                                                   | Hospital de Clinicas de Porto Alegre<br>Universidade Federal do Rio Grande do Sul                         | Rio Grande                 | Brazil         |
| Moreira de sa             | Renato Augusto  | Obstetrica                                                                                                         | Insulo Fernandes Figueira FIOCRUZ<br>Hospital Universitario Andro Pedro                                 | Rio de Janeiro             | Brazil         |
| Quintana                  | Silvana         | Departamento de Ginecologia e Obstetrcia                                                                          | Universit de Sao Paulo                                                                                   | Sao Paulo                  | Brazil         |
| Sjaus                     | Ana             | Department of Women's and Obstetrics Anesthesia                                                                    | Dalhousie University                                                                                      | Halifax                    | Canada         |
| Rahman                    | Arifa           | Research Team Lead                                                                                                 | St. Michael's Hospital<br>University of Toronto                                                           | Toronto                    | Canada         |
| Hamel-Thibault            | Audrey          | Dpartement d'obsttrique-gyncologie                                                                              | Centre de recherche du CHUS                                                                               | Sherbrooke                 | Canada         |
| Nash                      | Christopher     | Department of Obstetrics and Gynecology                                                                            | Dalhousie University                                                                                      | Halifax                    | Canada         |
| Kakkar                    | Fatima          | Pdiatrie                                                                                                          | Universit de Montral                                                                                    | Montral                   | Canada         |
| Berger                    | Howard          | Division of Maternal-Fetal Medicine<br>Department of Obstetrics and Gynecology                                     | St. Michael's Hospital<br>University of Toronto                                                           | Toronto                    | Canada         |
| Boucrair                  | Isabelle        | Dpartement d'Obsttrique-Gyncologie<br>et de Mdecine Sociale et Preventive                                      | Universit de Montral                                                                                    | Montral                   | Canada         |
| Pasquier                  | Jean-Charles    | Dpartement d'obsttrique et gyncologie                                                                           | Universit de Sherbrooke                                                                                  | Sherbrooke                 | Canada         |
| Snelgrove                 | John            | Department of Obstetrics and Gynecology                                                                            | Mount Sinai Hospital                                                                                      | Toronto                    | Canada         |
| Zipursky                  | Jonathan        | Internal medicine                                                                                                  | Sunnybrook Hospital                                                                                       | Toronto                    | Canada         |
| Lacroix                   | Meagan          | Research Coordinator                                                                                               | St. Michael's Hospital<br>University of Toronto                                                           | Toronto                    | Canada         |
| Whittle                   | Wendy           | Department of Obstetrics and Gynaecology                                                                           | Mount Sinai Hospital                                                                                      | Toronto                    | Canada         |
| Fuenzalida                | Javiera         | Maternal-Fetal Medicine<br>Department of Obstetrics                                                                | Escuela de Medicina<br>Pontificia Universidad Catlica de Chile                                           | Santiago                   | Chile          |
| Carvajal                  | Jorge           | Maternal-Fetal Medicine<br>Department of Obstetrics                                                                | Escuela de Medicina<br>Pontificia Universidad Catlica de Chile                                           | Santiago                   | China          |
| Guerra Canales            | Manuel          | Medicina Materno Fetal                                                                                             | Hospital San Jos                                                                                         | Santiago                   | China          |
| Hernandez                 | Olivia          |                                                                                                                    | Hospital Felix Bulnes Cerda                                                                               | Santiago                   | China          |
| Yin                       | Mingzhu         |                                                                                                                    | Xiangya Hospital                                                                                          | Changsha                   | China          |
| Chen                      | Xiang           | Dermatology                                                                                                        | Xiangya Hospital                                                                                          | Changsha                   | China          |
| Qi                        | Xiaolong        | General surgery department                                                                                         | The First Hospital of Lanzhou University                                                                  | Lanzhou                    | China          |
| Sanin Blair               | Jos Enrique    | Obstetrics                                                                                                         | Universidad Pontificia Bolivariana                                                                        | Medellin                   | Colombia       |
| Gonzalez                  | Ricardo         |                                                                                                                    | Centro Policlnico del olaya                                                                              | Bogota                     | Colombia       |
| Cano Aguilar              | Africa          | Obstetrcia y Ginecologia                                                                                          | Hospital Universitario San Cecilio                                                                        | Granada                    | Spain          |
| Rodrguez Vicente         | Agueda          | Obstetrcia y Ginecologia                                                                                          | Hospital Universitari de Girona Doctor Josep Trueta                                                       | Girona                     | Spain          |
| Tubau Navarra             | Albert          | Obstetrcia y Ginecologia                                                                                          | Hospital de Son Llatzer                                                                                   | Palma                      | Spain          |
| Puertas Prieto            | Alberto         | Obstetrcia y Ginecologia                                                                                          | Hospital Universitario Virgen de las Nieves                                                               | Granada                    | Spain          |
| Cano Garca               | Alejandra Maria | Ginecologia                                                                                                        | Hospital del Tajo                                                                                         | Aznjuez                   | Spain          |
| Carrascal Cumpido         | Ana             | Obstetrcia y Ginecologia                                                                                          | Hospital Quirnsalud Clideba                                                                              | Badajoz                    | Spain          |
| Villalba Yarza            | Ana             | Obstetrcia y Ginecologia                                                                                          | Complejo Asistencial Universitario de Salamanca                                                           | Salamanca                  | Spain          |
| Fillov Lavia              | Ana Cristina    | Obstetrcia y Ginecologia                                                                                          | Hospital de Sant Joan de Du de Martorell                                                                 | Martorell                  | Spain          |
| Fernandez Alonso          | Ana Maria       | UGC Obstetrcia y Ginecologia                                                                                      | Hospital Universitario Torrecardenas                                                                      | Almera                    | Spain          |
| Sanchez Vegazo Garca     | ngeles         | Obstetrcia y Ginecologia                                                                                          | San Pedro Hospital                                                                                        | La Rioja                   | Spain          |
| Gonc                     | Anna            | Fetal Medicine Research Center, BCNatal                                                                            | Barcelona Center for Maternal-Fetal and Neonatal Medicine (Hospital Clinic and Hospital Sant Joan de Du) | Barcelona                  | Spain          |
| Ruano Garcia              | Antonio         | Obstetrcia y Ginecologia                                                                                          | Hospital Juan Ramn Jimnez - Huelva                                                                      | Huelva                     | Spain          |
| Sanchez Munoz             | Antonio         | Obstetrcia y Ginecologia                                                                                          | Hospital General Universitario de Ciudad Real                                                             | Ciudad Real                | Spain          |
| Marcos Puig               | Beatrice        | Unidad Funcional de Obstetrcia del rea de la Mujer                                                               | HUP La Fe Valencia                                                                                        | Valncia                   | Spain          |
| Munoz Abellana            | Begona          | Obstetrcia y Ginecologia                                                                                          | Hospital Universitari Sant Joan de Reus                                                                   | Reus                       | Spain          |
| Garrido Luque             | Belen           | Obstetrcia y Ginecologia                                                                                          | rea de Gestin Sanitaria Este de Mlaga-Aaarquia                                                         | Torre del Mar              | Spain          |
| Fernandez Fernandez       | Camino          | Obstetrcia y Ginecologia                                                                                          | Complejo Asistencial de Leon                                                                              | Leon                       | Spain          |
| Larranaga Azcarate        | Carlos          | Obstetrcia y Ginecologia                                                                                          | Complejo Hospitalario Navarra                                                                             | Pamplona                   | Spain          |
| Baena Luque               | Carmen          | Obstetrcia y Ginecologia                                                                                          | Hospital Infanta Margarita                                                                                | Cabra                      | Spain          |
| Orizales Lago             | Carmen Maria    | Obstetrcia y Ginecologia                                                                                          | Hospital Universitario Severo Ochoa                                                                       | Legans                    | Spain          |
| Alvarez Colomo            | Cristina        | Obstetrcia y Ginecologia                                                                                          | Hospital Clinico Universitario de Valladolid                                                              | Valladolid                 | Spain          |
| Lesmes Heredia            | Cristina        | Obstetrcia y Ginecologia                                                                                          | Hospital Parc Tauli                                                                                       | Sabadell                   | Spain          |
| Ruiz Aguilar              | Cristina        | Obstetrcia y Ginecologia                                                                                          | Hospital Universitario Doctor Peset                                                                       | Valncia                   | Spain          |
| Ferriols Perez            | Elena           | Obstetrcia y Ginecologia                                                                                          | Hospital del Mar                                                                                          | Barcelona                  | Spain          |
| Parcal Salvador           | Elena           | Unidad Gestion Clinica Obstetrcia, Ginecologia y Pediatra                                                         | Hospital Minas de Riotinto                                                                                | Mnas de Riotinto          | Spain          |
| Carmona Sanchez           | Encarnacion     | UGC Obstetrcia y Ginecologia                                                                                      | Regional Hospital Santa Ana de Motril                                                                     | Motril                     | Spain          |
| Alvarez Silveas           | Esther          | Obstetrcia y Ginecologia                                                                                          | Complejo Hospitalario Universitario de Ourense                                                            | Ourense                    | Spain          |
| Canedo Carballeira        | Esther Maria    | Obstetrcia y Ginecologia                                                                                          | Hospital Universitario de a Corua                                                                        | Corua                     | Spain          |
| Moran Antolin             | Eva             | Obstetrcia y Ginecologia                                                                                          | Puerta de Hierro University Hospital Majadahonda                                                          | Majadahonda                | Spain          |
| Muelas Parraga            | Eva Maria       | Obstetrcia y Ginecologia                                                                                          | Hospital General Universitario Los Arcos del Mar Menor                                                    | Pozo Aledo                 | Spain          |
| Duvedo Perez              | Eva Maria       | Obstetrcia y Ginecologia                                                                                          | Hospital Universitario San Agustin                                                                        | Avils                     | Spain          |
| Gonzalez Carvajal         | Francisco Jesus | Obstetrcia y Ginecologia                                                                                          | Hospital Quirnsalud Marbella                                                                             | Marbella                   | Spain          |
| Agudo                     | lene           |                                                                                                                    | Hospital El Escorial                                                                                      | San Lorenzo de El Escorial | Spain          |
| Ocerin Bengoa             | Iratxe          | Obstetrcia y Ginecologia                                                                                          | Hospital de Mendara                                                                                       | Mendara                    | Spain          |
| Gastaca Abasolo           | Irene           | Obstetrcia y Ginecologia                                                                                          | University Hospital of Araba                                                                              | Vitoria-Gasteiz            | Spain          |
| Cabello de Alba Fernandez | Isabel          | Obstetrcia y Ginecologia                                                                                          | Hospital San Juan de La Cruz                                                                              | beda                      | Spain          |
| Alvarez                   | Javier          | Comit de tica de la investigacion con medicamentos                                                               | Hospital Clinico Universitario de Valladolid                                                              | Valladolid                 | Spain          |
| Duro Gomez                | Jorge           | Servicio de obstetrcia y ginecologia                                                                              | Hospital San Juan de Dios de Crdoba                                                                      | Crdoba                    | Spain          |
| Atxotegi                  | Jose            |                                                                                                                    | University Hospital of Araba                                                                              | Vitoria-Gasteiz            | Spain          |
| Navarrina Martnez        | Jos            | Obstetrcia y Ginecologia                                                                                          | Hospital Universitario Donostia                                                                           | Donostia                   | Spain          |
| Ruiz Aragon               | Jos            | Obstetrcia y Ginecologia                                                                                          | University Hospital of Ceuta                                                                              | Ceuta                      | Spain          |

|                          |                     |                                                                |                                                                              |                            |                          |
|--------------------------|---------------------|----------------------------------------------------------------|------------------------------------------------------------------------------|----------------------------|--------------------------|
| Sainz Bueno              | José Antonio        | Obstetrician                                                   | Hospital VIMMED, Grupo CHACON.                                               | Séville                    | Spain                    |
| Adánez García            | Jose Manuel         | Obstetricia                                                    | Hospital Universitario Central de Asturias                                   | Oviedo                     | Spain                    |
| Brouillon Molanes        | José Roman          | UGC Obstetricia Y Ginecología                                  | Hospital Universitario Puerta del Mar                                        | Cádiz                      | Spain                    |
| Wizner de Alva           | Juan Carlos         | Obstetricia y Ginecología                                      | Hospital San Pedro de Alcantara                                              | Cáceres                    | Spain                    |
| Forcen Acebal            | Laura               | Obstetricia y Ginecología                                      | University Hospital 12 de Octubre                                            | Madrid                     | Spain                    |
| Gonzalez Rodriguez       | Laura               | Obstetricia y Ginecología                                      | Hospital Alvaro Cunqueiro Vigo                                               | Vigo                       | Spain                    |
| Aceituno Velasco         | Longinos            | Obstetricia y Ginecología                                      | Hospital Público Comarcal la Inmaculada                                      | Huércal-Overa              | Spain                    |
| Cerrillos Gonzalez       | Lucas               | Unidad de Medicina Materno-Fetal Genética y Reprod             | Hospital Universitario Virgen del Rocío                                      | Séville                    | Spain                    |
| Trigo                    | Lucas               | Fetal Medicine Research Center                                 | Hospital Clinic and Hospital Sant Joan de Déu                                | Barcelona                  | Spain                    |
| Díaz Meca                | Lucía               | Obstetricia y Ginecología                                      | Hospital Universitario Virgen de la Arrixaca                                 | El Palmar                  | Spain                    |
| Parada Millán            | M Carmen            | Obstetricia y Ginecología                                      | Hospital do Barbanza                                                         | Ribeira                    | Spain                    |
| Molina Oller             | Magdalena           | Obstetricia y Ginecología                                      | Hospital Universitario Rafael Méndez                                         | Lorca                      | Spain                    |
| Dominguez Gonzalez       | Manuel              | UGC Obstetricia y Ginecología                                  | Hospital Comarcal La Línea de la Concepción                                  | La Línea de la Concepción  | Spain                    |
| Munoz Chapuli Gutierrez  | Mar                 | Obstetricia y Ginecología                                      | Hospital General Universitario Gregorio Marañón                              | Madrid                     | Spain                    |
| Caridad Ortiz Herrera    | Maria               | Obstetricia y Ginecología                                      | Hospital Costa del Sol                                                       | Marbella                   | Spain                    |
| Nieves Quesada Fernandez | Maria               | Obstetricia y Ginecología                                      | Hospital Virgen del Castillo                                                 | Yecla                      | Spain                    |
| Suarez Arana             | Maria               | Obstetricia y Ginecología                                      | Hospital Regional Universitario de Málaga                                    | Málaga                     | Spain                    |
| Teulon Gonzalez          | Maria               | Obstetricia y Ginecología                                      | Hospital Universitario de Fuenlabrada                                        | Fuenlabrada                | Spain                    |
| Zafra Bailera            | Maria               | Obstetricia y Ginecología                                      | Hospital Universitario Infanta Leonor                                        | Madrid                     | Spain                    |
| Duenas Carazo            | Maria Begona        | Obstetricia y Ginecología                                      | Santiago Clinic Hospital                                                     | Santiago de Compostela     | Spain                    |
| Gonzalez Macías          | Maria Carmen        | Obstetricia y Ginecología                                      | University Hospital of Puerto Real                                           | Puerto Real                | Spain                    |
| Pilar Guadix Martín      | Maria del           | Obstetricia y Ginecología                                      | Hospital Universitario Virgen Macarena                                       | Séville                    | Spain                    |
| Barbancho Lopez          | Maria del Carmen    | Obstetricia y Ginecología                                      | Infanta Sofia University Hospital                                            | San Sebastián de los Reyes | Spain                    |
| Medina Mallen            | Maria del Carmen    | Obstetricia y Ginecología                                      | Hospital Sant Pau                                                            | Barcelona                  | Spain                    |
| Pardo Pumar              | Maria Isabel        | Obstetricia y Ginecología                                      | Complejo Hospitalario Universitario de Pontevedra                            | Pontevedra                 | Spain                    |
| Gimeno Gimeno            | Maria Joaquina      | UGC Obstetricia y Ginecología                                  | Hospital Universitario Reina Sofía                                           | Cordoba                    | Spain                    |
| Nunez Valera             | Maria José          | Obstetricia y Ginecología                                      | Hospital Virgen De La Luz                                                    | Cuenca                     | Spain                    |
| Pelagay Escartin         | Maria José          | Obstetricia y Ginecología                                      | Hospital Universitari Arnau de Vilanova de Lleida                            | Lleida                     | Spain                    |
| Camacho Caro             | Marta               | UGC Obstetricia y Ginecología                                  | Hospital Universitario Virgen de la Victoria                                 | Málaga                     | Spain                    |
| García Sanchez           | Marta               | Obstetricia y Ginecología                                      | Hospital Quirónsalud Málaga                                                  | Málaga                     | Spain                    |
| Meca Casbas              | Marta Ruth          | Tocogynecologie                                                | Agencia Pública Sanitaria Poniente                                           | El Ejido                   | Spain                    |
| Fraça Padilla            | Mercedes            | Obstetricia y Ginecología                                      | Hospital de Basurto                                                          | Bilbao                     | Spain                    |
| Ramirez Gomez            | Mercedes            | Obstetricia y Ginecología                                      | Hospital General La Mancha Centro                                            | Alcázar de San Juan        | Spain                    |
| Catalina Coelho          | Zanora              | Obstetricia y Ginecología                                      | Hospital Virgen De La Concha                                                 | Zamora                     | Spain                    |
| Cruz Lemini              | Monica              | Women and Perinatal Health Research Group,                     | Hospital Sant Pau                                                            | Barcelona                  | Spain                    |
| Perez Perez              | Noelia              | Obstetricia y Ginecología                                      | Hospital Clinico Universitario San Carlos                                    | Madrid                     | Spain                    |
| Nieto Velasco            | Olga                | Obstetricia y Ginecología                                      | University Hospital Quirónsalud Madrid                                       | Pozuelo de Alarcón         | Spain                    |
| Alomar Mateu             | Onofre              | Obstetricia y Ginecología                                      | Hospital d'Inca                                                              | Inca                       | Spain                    |
| Martinez Perez           | Oscar               | Obstetricia y Ginecología                                      | Puerta de Hierro University Hospital Majadahonda                             | Majadahonda                | Spain                    |
| Vaquero Ruiz             | Oscar               | Obstetricia y Ginecología                                      | Hospital of Cabueñes                                                         | Gijón                      | Spain                    |
| Barrio Fernández         | Pablo Guillermo del | Obstetricia y Ginecología                                      | Hospital Universitario de Getafe                                             | Getafe                     | Spain                    |
| Montellu Gonzalez        | Pilar               | Obstetricia y Ginecología                                      | HM Hospitales                                                                | Madrid                     | Spain                    |
| Prats Rodríguez          | Pilar               | Obstetricia                                                    | Clinica Dexerus Muje                                                         | Barcelona                  | Spain                    |
| Vivaracho Terrer         | Porfirio            | Ginecología                                                    | Hospital Comarcal del Noroeste                                               | Caravaca de la Cruz        | Spain                    |
| Gonzales Seoane          | Raquel              | Obstetricia y Ginecología                                      | Hospital Universitario de Ferrol                                             | Ferrol                     | Spain                    |
| Jimenez Velazquez        | Raquel              | Obstetricia y Ginecología                                      | Hospital Quirónsalud Murcia                                                  | Murcia                     | Spain                    |
| Alvarez Fernandez        | Rebeca              | Obstetricia y Ginecología                                      | University Hospital Lucus Augusti                                            | Lugo                       | Spain                    |
| Lopez Perez              | Rocio               | Obstetricia y Ginecología                                      | Hospital General Universitario Santa Lucía                                   | Cartagena                  | Spain                    |
| Dostas Serna             | Rosa Maria          | Obstetricia y Ginecología                                      | Hospital Universitario Virgen de Valme                                       | Séville                    | Spain                    |
| Redondo Aguilar          | Rosario             | Obstetricia y Ginecología                                      | Complejo Hospitalario de Jaén                                                | Jaén                       | Spain                    |
| Bernardo Vega            | Rut                 | Obstetricia y Ginecología                                      | Hospital Universitario Rio Hortega                                           | Valladolid                 | Spain                    |
| Cano                     | Sandra              | Obstetricia y Ginecología                                      | Hospital Universitario del Tajo                                              | Madrid                     | Spain                    |
| Mateos Lopez             | Silvia              | Obstetricia y Ginecología                                      | Hospital Universitario de Torrejon                                           | Torrejón de Ardoz          | Spain                    |
| Fernandez Garcia         | Susana              | Obstetricia y Ginecología                                      | Hospital General de l'Hospitalet                                             | L'Hospitalet de Llobregat  | Spain                    |
| Soldevilla Perez         | Susana              | Obstetricia y Ginecología                                      | Hospital de Jerez de la Frontera                                             | Jerez de la Frontera       | Spain                    |
| Manrique Gomez           | Tania               | Obstetricia y Ginecología                                      | Quirónsalud Córdoba Hospital                                                 | Córdoba                    | Spain                    |
| Munoz Carmona            | Vitor               | Obstetricia y Ginecología                                      | Hospital Alto Guadalquivir                                                   | Andújar                    | Spain                    |
| Ko                       | Albert I.           | Department of Epidemiology of Microbial Diseases               | Yale of School of Public Health                                              | New Haven, Connecticut     | United States of America |
| Johnson                  | Anthony             | Obstetrics, Gynecology and Reproductive Sciences               | Children's Memorial Hermann Hospital                                         | Houston, Texas             | United States of America |
| Nielsen Saines           | Karin               | Department of Pediatrics<br>Division of Infectious Diseases    | David Geffen UCLA School of Medicine                                         | Los Angeles, CA            | United States of America |
| Cambou                   | Mary                | Cardiac Surgery                                                | David Geffen School of medicine UCLA                                         | Los Angeles, CA            | United States of America |
| Grechukhina              | Olga                | Department of Obstetrics, Gynecology and Reproductive Sciences | Yale School of Medicine                                                      | New Haven, Connecticut     | United States of America |
| Neupane                  | Sahara              | Internal medicine                                              | Williamsport hospital                                                        | Pennsylvania               | United States of America |
| Reddy                    | Uma                 | Department of Obstetrics, Gynecology and Reproductive Sciences | Yale School of Medicine                                                      | New Haven, Connecticut     | United States of America |
| Shah                     | Zubin               | Ophthalmology ?                                                | St. John's Episcopal Hospital                                                | New-York                   | United States of America |
| Breton                   | Bénédicte           | Department of Obstetrics and Gynecology                        | Hospital of Annecy Genevois                                                  | Annecy                     | France                   |
| Garabedian               | Charles             | Gynécologie-Obstétrique                                        | CHRU Lille                                                                   | Lille                      | France                   |
| Bertholdt                | Charline            | Pôle de la Femme                                               | Université de Lorraine                                                       | Nancy                      | France                   |
| Poncolet                 | Christophe          | Service de Gynécologie-Obstétrique                             | Centre Hospitalier René Dubos<br>Université Sorbonne-Paris-Cité              | Cergy-pontoise             | France                   |
| Subtil                   | Damien              | Department of Obstetrics                                       | Jeanne de Flandre University Hospital (CHRU)                                 | Lille                      | France                   |
| Musso                    | Didier              | Laboratoire                                                    | Laboratoire Eurofins Labauxr Guyane                                          | Guyane                     | France                   |
| Musso                    | Didier              | Maladies infectieuses                                          | IHU-Méditerranée infection<br>Aix Marseille Université IRD AP-HM SSA VITROME | Marseille                  | France                   |
| Henry                    | Estelle             | ARC coordinatrice                                              | Centre Hospitalier de Versailles André Mignot                                | Le Chesnay                 | France                   |
| Plantefeve               | Gaetan              | Service de Réanimation polyvalente et USC                      | Victor Dupouy Hospital                                                       | Argenteuil                 | France                   |
| Ducarme                  | Guillaume           | Departement of Obstetrics and Gynecology                       | Centre Hospitalier Departemental                                             | La Roche sur Yon           | France                   |
| Pelerin                  | Helene              | Clinical Research                                              | Centre Hospitalier Départemental Vendée                                      | Vendée                     | France                   |
| Dimet                    | Jerome              | Centre de recherche clinique                                   | Centre Hospitalier Mont de Marsan                                            | Mont de Marsan             | France                   |
| Cottin                   | Judith              | Pharmacovigilance                                              | Pole de Santé Publique - Lyon                                                | Lyon                       | France                   |
| Stremann                 | Julien              | Obstétrique et de Médecine fœtale                              | Hopital Necker-Enfants malades                                               | Paris                      | France                   |
| Lambert                  | Véronique           | Obstetrics                                                     | CHOG                                                                         | Saint-Laurent du Maroni    | France                   |
| Hcini                    | Najeh               | Obstetrics                                                     | CHOG                                                                         | Saint-Laurent du Maroni    | France                   |
| Salomon                  | Laurent             | Obstétrique et de Médecine fœtale                              | Hopital Necker-Enfants malades                                               | Paris                      | France                   |
| Sentilhes                | Loïc                | Department of Obstetrics and Gynecology                        | Bordeaux University Hospital                                                 | Bordeaux                   | France                   |

|                    |                |                                                                                     |                                                                                                   |                         |             |
|--------------------|----------------|-------------------------------------------------------------------------------------|---------------------------------------------------------------------------------------------------|-------------------------|-------------|
| Giral              | Marylene       | Gynécologie-Obstétrique                                                             | Centre Hospitalier de La Rochelle                                                                 | La Rochelle             | France      |
| Mottet             | Nicolas        | Department of Obstetrics and Gynecology                                             | University Hospital Jean Minjot Besançon<br>Université de Franche Comté                           | Besançon                | France      |
| Morel              | Olivier        | Pôle de la Femme                                                                    | Université de Lorraine                                                                            | Nancy                   | France      |
| Rozenberg          | Patrick        | Gynécologie-Obstétricien                                                            | Hôpital intercommunal de Poissy-saint germain (CHPS)                                              | Poissy                  | France      |
| Lucie              | Sedille        | Gynécologie-Obstétrique                                                             | Centre Hospitalier de La Rochelle                                                                 | La Rochelle             | France      |
| Qubel              | Thibaud        | Department of Gynecology and Obstetrics                                             | Intercommunal Hospital Centre of Poissy-Saint-Germain-en-Laye                                     | Poissy                  | France      |
| Karagianni         | Vasiliki       | Anesthésiste                                                                        | Hôpital Foch Suresnes                                                                             | Suresnes                | France      |
| Eqy                | Véronique      | Department of Obstetrics and Gynecology                                             | Grenoble University Hospital                                                                      | Grenoble                | France      |
| Ville              | Yves           | Obstétrique et de Médecine fœtale                                                   | Hôpital Necker-Enfants malades                                                                    | Paris                   | France      |
| Carles             | Gabriel        | Obstetrics                                                                          | CHDG                                                                                              | Saint-Laurent du Maroni | France      |
| Ruehl              | Ina            | Obstetrics department                                                               | Perinatal Center Red Cross Hospital                                                               | Munich                  | Germany     |
| Cleary             | Brian          | Chief Pharmacist                                                                    | The Rotunda Hospital                                                                              | Dublin                  | Ireland     |
| Malone             | Fergal         | Maternal-fetal medicine                                                             | Rotunda Hospital and Royal College of Surgeons                                                    | Dublin                  | Ireland     |
| Higgins            | Mary           | Obstetrics                                                                          | National Maternity Hospital                                                                       | Dublin                  | Ireland     |
| Geary              | Michael        | Maternal-fetal medicine                                                             | Rotunda Hospital and Royal College of Surgeons                                                    | Dublin                  | Ireland     |
| Hadar              | Eran           | Helen Schneider Hospital for Women                                                  | Sackler Faculty of Medicine                                                                       | Tel Aviv                | Israel      |
| Hadar              | Eran           | Maternal Fetal Medicine Division                                                    | Rabin Medical Center                                                                              | Petah Tikva             | Israel      |
| Malinger           | Gustavo        | Head of Division of Ultrasound in ObGyn                                             | Lis Maternity Hospital<br>Tel Aviv Medical Center                                                 | Tel Aviv                | Israel      |
| Sela               | Hen            | Obstetrics and Gynecology                                                           | Shaare Zedek Medical Center                                                                       | Jérusalem               | Israel      |
| Krajden Haratz     | Karina         | Division of Ultrasound in Obstetrics and Gynecology                                 | Lis Maternity Hospital                                                                            | Tel Aviv                | Israel      |
| Maymon             | Ron            | President of the Israeli Society of Obstetrics and Gynecology                       | Hasaf Harofe Medical Center<br>Affiliated to the Tel Aviv University                              | Tel Aviv                | Israel      |
| Yogev              | Yariv          | Director of the Lis Maternity Hospital                                              | Tel Aviv Medical Center<br>Affiliated to the Tel Aviv University                                  | Tel Aviv                | Israel      |
| De Luca            | Carmen         | Teratology Information Service                                                      | Fondazione Policlinico Universitario Agostino Gemelli IRCCS                                       | Rome                    | Italia      |
| De Santis          | Marco          | Teratology Information Service                                                      | Fondazione Policlinico Universitario Agostino Gemelli IRCCS                                       | Rome                    | Italia      |
| Rosso              | Telefeno       | Teratology Information Service                                                      | Fondazione Policlinico Universitario Agostino Gemelli IRCCS                                       | Rome                    | Italia      |
| Atallah            | David          | Department of Obstetrics and Gynecology<br>Gynecologic and Breast Oncologic Surgery | Hôtel Dieu de France University Hospital<br>Saint Joseph University                               | Beirut                  | Lebanon     |
| Boguziene          | Emilija        | Obstetrics and Gynecology                                                           | Siauliai Republic Hospital                                                                        | Rokiškis                | Lithuania   |
| Germes Pina        | Fernando       | Obstetrics and Gynecology                                                           | General Hospital "Dr. Salvador Zubirán Anchondo"                                                  | Chihuahua               | Mexique     |
| Van den Akker      | Thomas         | Obstetrics and Gynecology                                                           | Leiden University Medical Center                                                                  | Leiden                  | Netherlands |
| Gil-Guevara        | Enrique        | Department of gynecology and Obstetrics                                             | Delgado Clinic                                                                                    | Lima                    | Peru        |
| Marchena           | Jeanette       | Department of gynecology and Obstetrics                                             | Delgado Clinic                                                                                    | Lima                    | Peru        |
| Ventura            | Walter         | Servico de medicina fetal                                                           | Instituto Nacional Materno Perinatal                                                              | Lima                    | Peru        |
| Pereira            | Alcides        | Head of Obstetrics and Gynecology                                                   | Hospital Garcia de Orta                                                                           | Almada                  | Portugal    |
| Pereira            | Alcides        | Obstétrique                                                                         | Maternity of Hospital Garcia de Orta                                                              | Lisbonne                | Portugal    |
| Ayres de Campos    | Diogo          | Faculty of Medicine                                                                 | Santa Maria University Hospital                                                                   | Lisbonne                | Portugal    |
| Charepe            | Nadia          | Obstetrics and Gynecology                                                           | Alfredo da Costa Maternity                                                                        | Lisbonne                | Portugal    |
| Viana Pinto        | Pedro          | Servico ginecologia e obstetrica                                                    | Centro Hospitalar e universitario São João                                                        | Porto                   | Portugal    |
| Ntasumbumyange     | Diomedes       | OBGYN department CHUK                                                               | University of Rwanda<br>College of Medicine and Health Sciences/ School of Medicine and Pharmacy/ | Kigali                  | Rwanda      |
| Rulisa             | Stephen        | Obstetrics                                                                          | Eagle research center                                                                             | Kigali                  | Rwanda      |
| Panchaud           | Alice          | Pharmacy                                                                            | CHUV - Lausanne                                                                                   | Lausanne                | Switzerland |
| Radan              | Anda-Petronela | Department of Obstetrics and Gynecology                                             | Inselspital                                                                                       | Berne                   | Switzerland |
| Papadia            | Andrea         | Gynécologie-Obstétrique                                                             | Ospedale Regionale di Lugano                                                                      | Lugano                  | Switzerland |
| Bloch              | Andrea         | Gynécologie-Obstétrique                                                             | Hôpital du Jura                                                                                   | Delémont                | Switzerland |
| Feki               | Anis           | Service de gynécologie obstétrique                                                  | HFR Fribourg, Hôpital cantonal                                                                    | Fribourg                | Switzerland |
| Muller Brochut     | Anne-Claude    | Gynécologie-Obstétrique                                                             | GynECHO                                                                                           | Fribourg                | Switzerland |
| Toussaint          | Arnaud         | Department of Gynecology and Obstetrics                                             | Intercantonal Hospital of Broye                                                                   | Payenne                 | Switzerland |
| Eggel-Hort         | Béatrice       | Service de Gynécologie et Obstétrique                                               | Centre Hospitalier du valais romand<br>Hôpital de Sion                                            | Sion                    | Switzerland |
| Martinez de Tejada | Begoña         | Obstetrics Division, Department of Pediatrics Gynecology and Obstetrics             | University Hospitals of Geneva                                                                    | Genève                  | Switzerland |
| Frey Tirri         | Brigitte       | Frauenklinik                                                                        | Kantonsspital Baselstad                                                                           | Liestal                 | Switzerland |
| Weber              | Brigitte       | Gynécologie-Obstétrique                                                             | Kantonsspital Obwalden (KSOW)                                                                     | Sarnen                  | Switzerland |
| Blume              | Carolin        | Gynécologie-Obstétrique                                                             | Kantonsspital Chur                                                                                | Chur                    | Switzerland |
| Monod              | Cécile         | Department of obstetrics and gynecology                                             | University Hospital Basel                                                                         | Basel                   | Switzerland |
| Kahlert            | Christian      | Infectious Diseases and Hospital Epidemiology                                       | Frauenklinik Kantonsspital                                                                        | Saint Gall              | Switzerland |
| Voelt              | Cora           | Gynécologie-Obstétrique                                                             | Spital Grabs                                                                                      | Grabs                   | Switzerland |
| Surbek             | Daniel         | Department of Obstetrics and Gynecology                                             | Inselspital                                                                                       | Berne                   | Switzerland |
| Baud               | David          | Obstetrics                                                                          | CHUV - Lausanne                                                                                   | Lausanne                | Switzerland |
| Bassler            | Dirk           | Department of Neonatology                                                           | UniversitätsSpital Zürich                                                                         | Zurich                  | Switzerland |
| Mueller            | Doris          | Coordination des études des sages-femmes                                            | Universitätsspital Basel                                                                          | Bâle                    | Switzerland |
| Prentl             | Elke Barbara   | Obstetrics and Gynecology                                                           | Kantonsspital Winterthur                                                                          | Winterthur              | Switzerland |
| Gerber             | Eva            | Obstetrics                                                                          | CHUV - Lausanne                                                                                   | Lausanne                | Switzerland |
| Rothe              | Friederike     | Gynécologie-Obstétrique                                                             | See-Spital Horgen                                                                                 | Horgen                  | Switzerland |
| Eric               | Giannoni       | Neonatology                                                                         | CHUV - Lausanne                                                                                   | Lausanne                | Switzerland |
| Favre              | Guillaume      | Obstetrics                                                                          | CHUV - Lausanne                                                                                   | Lausanne                | Switzerland |
| Hoesli             | Irene          | Department of obstetrics and gynecology                                             | University Hospital Basel                                                                         | Basel                   | Switzerland |
| Mathis             | Jérôme         | Gynécologie-Obstétrique                                                             | Spitalzentrum Biel-Bienne                                                                         | Bienne                  | Switzerland |
| Lepageon           | Karine         | Obstetrics                                                                          | CHUV - Lausanne                                                                                   | Lausanne                | Switzerland |
| Aebi-Popp          | Karoline       | Department of Infectious Diseases                                                   | University Hospital Bern                                                                          | Berne                   | Switzerland |
| Pomar              | Leo            | Obstetrics                                                                          | CHUV - Lausanne                                                                                   | Lausanne                | Switzerland |
| Schäffer           | Leonhard       | Obstetrics                                                                          | Cantonal Hospital of Baden<br>Affiliated Hospital of the University of Zurich                     | Baden                   | Switzerland |
| Raio               | Luigi          | Department of Obstetrics and Gynecology                                             | Inselspital                                                                                       | Berne                   | Switzerland |
| Vouga              | Manon          | Obstetrics                                                                          | CHUV - Lausanne                                                                                   | Lausanne                | Switzerland |
| Huesler Charles    | Margaret       | Gynécologie-Obstétrique                                                             | Spital Männedorf                                                                                  | Männedorf               | Switzerland |
| Rossier            | Marie-Claude   | Obstetrics and Gynecology                                                           | Hôpital Riviera Chablais                                                                          | Rennaz                  | Switzerland |
| Hodel              | Markus         | Obstétrique et de Médecine fœtale                                                   | Luzerner Kantonsspital                                                                            | Lucerne                 | Switzerland |
| Kaufmann           | Martin         | Gynécologie-Obstétrique                                                             | Spital Bülach                                                                                     | Bülach                  | Switzerland |
| Gavillet           | Mathilde       | Hematology                                                                          | CHUV - Lausanne                                                                                   | Lausanne                | Switzerland |
| Bouvain            | Michel         | Pôle Mère Enfant                                                                    | GHOL, Hôpital de Nyon                                                                             | Nyon                    | Switzerland |
| Todesco Bernasconi | Monya          | Gynécologie-Obstétrique                                                             | Kantonsspital Aarau                                                                               | Aarau                   | Switzerland |
| Bickle             | Myriam         | Neonatology                                                                         | CHUV - Lausanne                                                                                   | Lausanne                | Switzerland |
| Ochsenein Köhler   | Nicole         | Obstétrique                                                                         | UniversitätsSpital Zürich                                                                         | Zurich                  | Switzerland |
| Jarrah             | Omar           | Department of Obstetrics and Gynecology                                             | Hospital Obereggin                                                                                | Sarnedon                | Switzerland |
| Kanellos           | Panagiotis     | Gynécologie-Obstétrique                                                             | Kantonsspital Uri                                                                                 | Altdorf                 | Switzerland |
| Brasier Lutz       | Pascale        | Gynécologie-Obstétrique                                                             | Luzerner Kantonsspital                                                                            | Lucerne                 | Switzerland |

|                  |               |                                                                        |                                                                |              |             |
|------------------|---------------|------------------------------------------------------------------------|----------------------------------------------------------------|--------------|-------------|
| Capoccia Brugger | Romina        | Gynécologie-Obstétrique                                                | Réseau Hospitalier Neuchâtelois                                | Neuchâtel    | Switzerland |
| Heldstab         | Sandra        | Department of Anthropology                                             | University of Zurich                                           | Zurich       | Switzerland |
| Heldstab         | Sandra Andrea | Frauenklinik                                                           | Kantonsspital Aarau                                            | Aarau        | Switzerland |
| Rouiller Cornu   | Sylvie        | Gynécologie-Obstétrique                                                | Etablissement Hospitalier de la Côte                           | Morges       | Switzerland |
| Fischer          | Tina          | Obstétrique                                                            | Frauenklinik Kantonsspital                                     | Saint Gall   | Switzerland |
| Winterfeld       | Ursula        | Swiss Teratogen Information Service & Service of clinical Pharmacology | CHUV - Lausanne                                                | Lausanne     | Switzerland |
| Lambelet         | Valentine     | Obstetrics                                                             | CHUV - Lausanne                                                | Lausanne     | Switzerland |
| Rieder           | Wawrzyniec    | Obstetrics                                                             | CHUV - Lausanne                                                | Lausanne     | Switzerland |
| Greub            | Gilbert       | Institut of microbiology                                               | CHUV - Lausanne                                                | Lausanne     | Switzerland |
| Gengler          | Carole        | Institute of pathology                                                 | CHUV - Lausanne                                                | Lausanne     | Switzerland |
| Patel            | Rena C        | Division of Infectious Diseases, Dept. of Medicine                     | International Clinical Research Center, Dept. of Global Health | Seattle      | USA         |
| Huespe           | Miguel Angel  | Department of materno.fetal medicine                                   | D.F.Santojanni Hospital                                        | Buenos Aires | Argentina   |
| Nieto-Calvache   | Albaro José   | Tertiary Obstetric Unit                                                | Fundación Valle del Lili                                       | Cali         | Colombia    |
